# Supplementary material
Source: Springer Nature journal article supplement (https://www.springermedizin.de/resource/supplementary/12974_2010_374_MOESM7_ESM.pdf/9601506)

**(A)**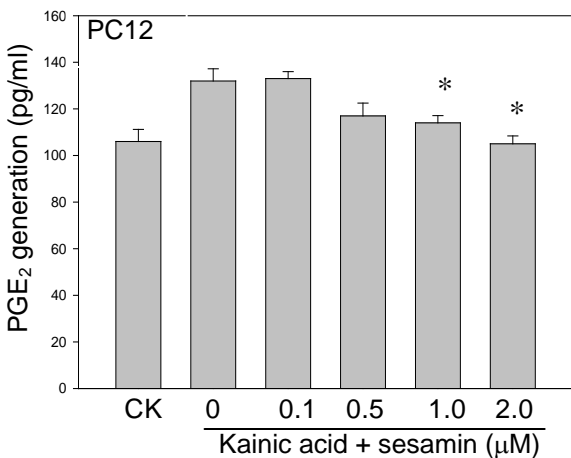**(B)**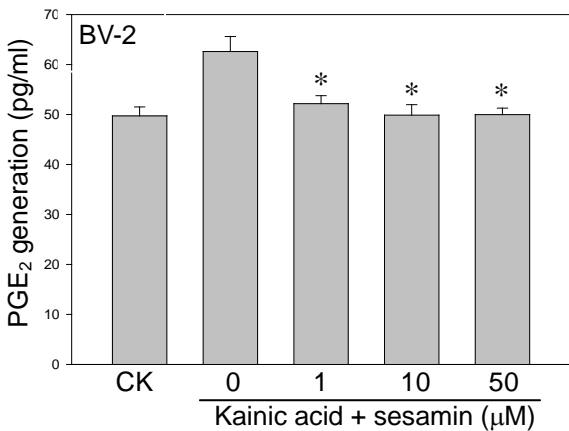

Supplement: MOESM7 [file 9601506]
